# Supplementary material for: The origin of the lower fourth molar in canids, inferred by individual variation
Source: PeerJ. 2016 Nov 8;4:e2689. doi: 10.7717/peerj.2689 (PMC5103830; doi:10.7717/peerj.2689)
Supplement: Supplemental Information 1 [file peerj-04-2689-s001.xlsx]

## Sheet: Sheet1
Species	Subspecies	Institution	Specimen Number	m1size	m2size	m3size	m4size	m2/m1	m3/m1	Existence of m4	Location
Canis latrans	lestes	NMNH	81974	156.762	55.281	11.66	*	0.35264	0.07438	absent	Colorado
Canis latrans	lestes	NMNH	76687	129.383	46.077	14.121	*	0.35613	0.109141	absent	Colorado
Canis latrans	lestes	NMNH	70671	169.332	54.64	12.111	*	0.32268	0.071522	absent	Colorado
Canis latrans	lestes	NMNH	70670	133.814	52.016	11.26	*	0.38872	0.084147	absent	Colorado
Canis latrans	lestes	NMNH	70551	126.157	49.236	11.419	*	0.39028	0.090514	absent	Colorado
Canis latrans	lestes	NMNH	53925	146.02	51.329	16.04	*	0.35152	0.109848	absent	Colorado
Canis latrans	lestes	NMNH	53924	125.527	50.956	14.52	*	0.40594	0.115672	absent	Colorado
Canis latrans	lestes	NMNH	81975	149.493	51.185	14.489	*	0.34239	0.096921	absent	Colorado
Canis latrans	lestes	NMNH	81976	167.588	48.549	17.739	*	0.28969	0.105849	absent	Colorado
Canis latrans	lestes	NMNH	87448	167.464	57.15	15.17	*	0.34127	0.090587	absent	Colorado
Canis latrans	lestes	NMNH	139117	150.648	59.554	18.367	*	0.39532	0.12192	absent	Colorado
Canis latrans	lestes	NMNH	139129	155.5	61.051	16.174	*	0.39261	0.104013	absent	Colorado
Canis latrans	lestes	NMNH	147651	166.969	50.281	*	*	0.30114	0	absent	Colorado
Canis latrans	lestes	NMNH	147658	156.98	51.469	15.089	*	0.32787	0.096121	absent	Colorado
Canis latrans	lestes	NMNH	147655	142.967	57.112	16.984	*	0.39948	0.118797	absent	Colorado
Canis latrans	lestes	NMNH	147654	140.551	51.108	16.274	*	0.36363	0.115787	absent	Colorado
Canis latrans	lestes	NMNH	147653	147.11	59.879	14.131	*	0.40704	0.096057	absent	Colorado
Canis latrans	lestes	NMNH	150667	163.987	60.525	18.689	*	0.36908	0.113966	absent	Colorado
Canis latrans	lestes	NMNH	150666	147.682	45.128	10.365	*	0.30558	0.070185	absent	Colorado
Canis latrans	lestes	NMNH	150389	142.243	48.548	18.161	*	0.3413	0.127676	absent	Colorado
Canis latrans	lestes	NMNH	150388	156.024	57.083	17.226	*	0.36586	0.110406	absent	Colorado
Canis latrans	lestes	NMNH	150387	149.985	54.146	15.712	*	0.36101	0.104757	absent	Colorado
Canis latrans	lestes	NMNH	148519	151.199	64.773	15.569	*	0.4284	0.10297	absent	Colorado
Canis latrans	lestes	NMNH	148497	173.714	55.274	17.492	*	0.31819	0.100694	absent	Colorado
Canis latrans	lestes	NMNH	151423	138.289	48.704	13.898	*	0.35219	0.1005	absent	Colorado
Canis latrans	lestes	NMNH	151422	167.126	57.008	13.003	*	0.34111	0.077804	absent	Colorado
Canis latrans	lestes	NMNH	151421	147.696	46.796	11.717	*	0.31684	0.079332	absent	Colorado
Canis latrans	lestes	NMNH	151420	163.427	55.815	16.951	*	0.34153	0.103722	absent	Colorado
Canis latrans	lestes	NMNH	151419	159.553	60.635	16.283	*	0.38003	0.102054	absent	Colorado
Canis latrans	lestes	NMNH	151099	161.245	57.975	17.905	*	0.35955	0.111042	absent	Colorado
Canis latrans	lestes	NMNH	150670	162.725	62.398	16.905	*	0.38346	0.103887	absent	Colorado
Canis latrans	lestes	NMNH	150669	141.904	43.622	12.967	*	0.30741	0.091379	absent	Colorado
Canis latrans	lestes	NMNH	150668	149.482	57.337	15.703	*	0.38357	0.105049	absent	Colorado
Canis latrans	lestes	NMNH	156624	148.512	50.355	15.058	*	0.33906	0.101392	absent	Colorado
Canis latrans	lestes	NMNH	206674	159.035	58.969	15.127	*	0.37079	0.095117	absent	Colorado
Canis latrans	lestes	NMNH	206675	145.715	50.653	13.633	*	0.34762	0.093559	absent	Colorado
Canis latrans	lestes	NMNH	206676	150.393	54.957	17.832	*	0.36542	0.118569	absent	Colorado
Canis latrans	lestes	NMNH	206677	143.279	51.46	15.412	*	0.35916	0.107566	absent	Colorado
Canis latrans	lestes	NMNH	206678	147.095	54.933	18.776	*	0.37345	0.127645	absent	Colorado
Canis latrans	lestes	NMNH	210729	147.929	52.072	12.874	*	0.35201	0.087028	absent	Colorado
Canis latrans	lestes	NMNH	210730	156.504	54.041	16.54	*	0.3453	0.105684	absent	Colorado
Canis latrans	lestes	NMNH	210731	150.658	55.42	12.645	6.645	0.36785	0.083932	present	Colorado
Canis latrans	lestes	NMNH	210740	139.651	53.026	15.757	*	0.3797	0.112831	absent	Colorado
Canis latrans	lestes	NMNH	210739	172.037	69.046	16.217	*	0.40134	0.094265	absent	Colorado
Canis latrans	lestes	NMNH	210738	164.692	56.385	15.352	*	0.34237	0.093216	absent	Colorado
Canis latrans	lestes	NMNH	210737	147.66	53.699	13.913	*	0.36367	0.094223	absent	Colorado
Canis latrans	lestes	NMNH	210736	149.635	51.682	11.723	*	0.34539	0.078344	absent	Colorado
Canis latrans	lestes	NMNH	210735	150.161	65.248	14.456	*	0.43452	0.09627	absent	Colorado
Canis latrans	lestes	NMNH	210734	162.202	58.858	19.589	*	0.36287	0.120769	absent	Colorado
Canis latrans	lestes	NMNH	210733	148.463	54.861	14.35	*	0.36953	0.096657	absent	Colorado
Canis latrans	lestes	NMNH	210732	151.315	58.557	17.952	*	0.38699	0.11864	absent	Colorado
Canis latrans	lestes	NMNH	210741	158.875	60.272	16.026	*	0.37937	0.100872	absent	Colorado
Canis latrans	lestes	NMNH	210743	168.367	58.142	14.16	*	0.34533	0.084102	absent	Colorado
Canis latrans	lestes	NMNH	210744	178.9	65.859	16.783	*	0.36813	0.093812	absent	Colorado
Canis latrans	lestes	NMNH	210848	155.444	64.484	20.721	*	0.41484	0.133302	absent	Colorado
Canis latrans	lestes	NMNH	210898	136.386	53.643	16.696	*	0.39332	0.122417	absent	Colorado
Canis latrans	lestes	NMNH	210899	154.236	54.527	14.604	*	0.35353	0.094686	absent	Colorado
Canis latrans	lestes	NMNH	210900	155.89	62.682	17.995	*	0.40209	0.115434	absent	Colorado
Canis latrans	lestes	NMNH	210901	162.294	58.448	17.657	*	0.36014	0.108796	absent	Colorado
Canis latrans	lestes	NMNH	210902	173.746	57.607	15.954	*	0.33156	0.091824	absent	Colorado
Canis latrans	lestes	NMNH	210903	170.003	60.502	15.554	*	0.35589	0.091493	absent	Colorado
Canis latrans	lestes	NMNH	210904	155.151	59.871	14.352	*	0.38589	0.092503	absent	Colorado
Canis latrans	lestes	NMNH	210905	120.371	45.074	16.081	*	0.37446	0.133595	absent	Colorado
Canis latrans	lestes	NMNH	210924	162.041	58.354	13.265	*	0.36012	0.081862	absent	Colorado
Canis latrans	lestes	NMNH	210930	168.561	59.659	18.777	*	0.35393	0.111396	absent	Colorado
Canis latrans	lestes	NMNH	210931	122.456	52.876	16.326	*	0.4318	0.133321	absent	Colorado
Canis latrans	lestes	NMNH	212947	175.347	63.686	15.796	*	0.3632	0.090084	absent	Colorado
Canis latrans	lestes	NMNH	212928	147.544	53.633	15.557	*	0.36351	0.10544	absent	Colorado
Canis latrans	lestes	NMNH	212927	154.378	52.957	12.736	*	0.34303	0.082499	absent	Colorado
Canis latrans	lestes	NMNH	211730	126.437	48.602	13.178	*	0.3844	0.104226	absent	Colorado
Canis latrans	lestes	NMNH	211729	169.185	70.356	21.41	*	0.41585	0.126548	absent	Colorado
Canis latrans	lestes	NMNH	211632	137.013	51.501	14.028	*	0.37588	0.102384	absent	Colorado
Canis latrans	lestes	NMNH	211086	141.444	54.488	14.538	*	0.38523	0.102783	absent	Colorado
Canis latrans	lestes	NMNH	210932	162.036	56.708	14.8	*	0.34997	0.091338	absent	Colorado
Canis latrans	lestes	NMNH	212948	167.549	62.191	16.881	*	0.37118	0.100753	absent	Colorado
Canis latrans	lestes	NMNH	212949	147.887	58.513	12.814	*	0.39566	0.086647	absent	Colorado
Canis latrans	lestes	NMNH	212950	150.33	54.869	20.021	*	0.36499	0.13318	absent	Colorado
Canis latrans	lestes	NMNH	212951	138.46	43.741	11.332	*	0.31591	0.081843	absent	Colorado
Canis latrans	lestes	NMNH	212952	138.852	54.042	13.937	*	0.38921	0.100373	absent	Colorado
Canis latrans	lestes	NMNH	212953	156.823	53.029	13.84	*	0.33815	0.088252	absent	Colorado
Canis latrans	lestes	NMNH	212954	158.998	54.181	11.341	*	0.34077	0.071328	absent	Colorado
Canis latrans	lestes	NMNH	212955	163.754	55.948	12.864	*	0.34166	0.078557	absent	Colorado
Canis latrans	lestes	NMNH	213200	159.501	57.233	15.072	*	0.35883	0.094495	absent	Colorado
Canis latrans	lestes	NMNH	213187	133.388	50.314	14.357	*	0.3772	0.107633	absent	Colorado
Canis latrans	lestes	NMNH	213186	135.976	53.402	15.152	*	0.39273	0.111431	absent	Colorado
Canis latrans	lestes	NMNH	213185	143.236	58.346	15.401	*	0.40734	0.107522	absent	Colorado
Canis latrans	lestes	NMNH	213184	140.713	54.863	12.581	*	0.38989	0.089409	absent	Colorado
Canis latrans	lestes	NMNH	213183	143.837	49.588	13.303	*	0.34475	0.092487	absent	Colorado
Canis latrans	lestes	NMNH	213182	131.233	58.779	13.432	*	0.4479	0.102352	absent	Colorado
Canis latrans	lestes	NMNH	212957	183.894	62.209	19.913	*	0.33829	0.108285	absent	Colorado
Canis latrans	lestes	NMNH	213248	130.481	45.465	12.49	*	0.34844	0.095723	absent	Colorado
Canis latrans	lestes	NMNH	213247	169.405	55.366	15.712	*	0.32683	0.092748	absent	Colorado
Canis latrans	lestes	NMNH	213246	143.243	50.622	17.253	*	0.3534	0.120446	absent	Colorado
Canis latrans	lestes	NMNH	213244	175.636	61.18	16.507	*	0.34833	0.093984	absent	Colorado
Canis latrans	lestes	NMNH	213243	140.263	52.259	15.299	*	0.37258	0.109074	absent	Colorado
Canis latrans	lestes	NMNH	213242	143.746	45.967	9.928	*	0.31978	0.069066	absent	Colorado
Canis latrans	lestes	NMNH	213241	116.248	46.483	16.103	*	0.39986	0.138523	absent	Colorado
Canis latrans	lestes	NMNH	213202	147.557	54.465	17.333	*	0.36911	0.117466	absent	Colorado
Canis latrans	lestes	NMNH	213201	146.515	57.809	18.034	*	0.39456	0.123086	absent	Colorado
Canis latrans	lestes	NMNH	213249	180.772	59.429	17.013	*	0.32875	0.094113	absent	Colorado
Canis latrans	lestes	NMNH	213250	157.61	53.649	15.34	*	0.34039	0.097329	absent	Colorado
Canis latrans	lestes	NMNH	213251	181.203	66.441	15.548	16.097	0.36667	0.085804	present	Colorado
Canis latrans	lestes	NMNH	213252	151.214	51.323	14.952	*	0.33941	0.09888	absent	Colorado
Canis latrans	lestes	NMNH	213253	155.936	63.332	19.907	*	0.40614	0.127661	absent	Colorado
Canis latrans	lestes	NMNH	213254	158.429	60.939	14.995	*	0.38465	0.094648	absent	Colorado
Canis latrans	lestes	NMNH	213255	139.871	55.445	17.101	*	0.3964	0.122263	absent	Colorado
Canis latrans	lestes	NMNH	213256	154.761	53.563	14.913	*	0.3461	0.096361	absent	Colorado
Canis latrans	lestes	NMNH	213257	144.378	51.412	15.501	*	0.35609	0.107364	absent	Colorado
Canis latrans	lestes	NMNH	214080	141.629	53.064	14.538	*	0.37467	0.102648	absent	Colorado
Canis latrans	lestes	NMNH	213265	154.386	56.133	16.048	*	0.36359	0.103947	absent	Colorado
Canis latrans	lestes	NMNH	213264	136.844	49.875	16.233	*	0.36447	0.118624	absent	Colorado
Canis latrans	lestes	NMNH	213263	143.533	51.225	16.239	*	0.35689	0.113138	absent	Colorado
Canis latrans	lestes	NMNH	213262	132.104	48.054	13.709	*	0.36376	0.103774	absent	Colorado
Canis latrans	lestes	NMNH	213261	136.382	53.672	16.625	15.341	0.39354	0.1219	present	Colorado
Canis latrans	lestes	NMNH	213260	146.362	59.29	13.478	*	0.40509	0.092087	absent	Colorado
Canis latrans	lestes	NMNH	213259	155.251	49.563	13.24	*	0.31924	0.085281	absent	Colorado
Canis latrans	lestes	NMNH	213258	139.035	55.783	16.985	*	0.40122	0.122163	absent	Colorado
Canis latrans	lestes	NMNH	214081	119.747	40.865	11.833	*	0.34126	0.098817	absent	Colorado
Canis latrans	lestes	NMNH	214082	131.369	52.773	12.664	*	0.40172	0.0964	absent	Colorado
Canis latrans	lestes	NMNH	214083	153.946	48.349	13.098	*	0.31406	0.085082	absent	Colorado
Canis latrans	lestes	NMNH	214084	140.767	51.994	14.852	*	0.36936	0.105508	absent	Colorado
Canis latrans	lestes	NMNH	214085	154.823	56.88	20.654	*	0.36739	0.133404	absent	Colorado
Canis latrans	lestes	NMNH	214086	138.388	50.785	14.829	*	0.36698	0.107155	absent	Colorado
Canis latrans	lestes	NMNH	215078	150.225	50.644	12.065	*	0.33712	0.080313	absent	Colorado
Canis latrans	lestes	NMNH	215079	154.038	54.273	17.601	*	0.35234	0.114264	absent	Colorado
Canis latrans	lestes	NMNH	215088	152.55	48.924	18.678	*	0.32071	0.122439	absent	Colorado
Canis latrans	lestes	NMNH	215087	147.262	54.947	12.55	*	0.37312	0.085222	absent	Colorado
Canis latrans	lestes	NMNH	215086	136.497	52.564	10.55	*	0.38509	0.077291	absent	Colorado
Canis latrans	lestes	NMNH	215085	136.328	61.67	15.482	*	0.45236	0.113564	absent	Colorado
Canis latrans	lestes	NMNH	215083	142.046	47.978	11.797	*	0.33776	0.083051	absent	Colorado
Canis latrans	lestes	NMNH	215082	161.441	57.258	*	*	0.35467	0	absent	Colorado
Canis latrans	lestes	NMNH	215081	158.002	54.156	14.536	*	0.34276	0.091999	absent	Colorado
Canis latrans	lestes	NMNH	215080	146.934	48.615	13.958	*	0.33086	0.094995	absent	Colorado
Canis latrans	lestes	NMNH	215090	150.213	51.136	10.489	*	0.34042	0.069828	absent	Colorado
Canis latrans	lestes	NMNH	215091	125.505	44.141	13.992	*	0.35171	0.111486	absent	Colorado
Canis latrans	lestes	NMNH	215092	149.506	50.632	10.841	*	0.33866	0.072512	absent	Colorado
Canis latrans	lestes	NMNH	215093	177.16	65.482	12.118	*	0.36962	0.068401	absent	Colorado
Canis latrans	lestes	NMNH	215094	161.462	63.97	19.325	*	0.39619	0.119688	absent	Colorado
Canis latrans	lestes	NMNH	215095	163.045	59.115	13.856	*	0.36257	0.084983	absent	Colorado
Canis latrans	lestes	NMNH	215097	158.567	56.571	14.481	*	0.35676	0.091324	absent	Colorado
Canis latrans	lestes	NMNH	216324	154.831	52.802	15.381	*	0.34103	0.099341	absent	Colorado
Canis latrans	lestes	NMNH	216323	135.284	51.168	11.592	*	0.37823	0.085686	absent	Colorado
Canis latrans	lestes	NMNH	216322	155.865	54.277	17.639	*	0.34823	0.113168	absent	Colorado
Canis latrans	lestes	NMNH	216287	127.676	49.972	14.311	*	0.3914	0.112088	absent	Colorado
Canis latrans	lestes	NMNH	215114	134.662	49.538	13.215	*	0.36787	0.098135	absent	Colorado
Canis latrans	lestes	NMNH	215112	133.855	52.707	15.174	*	0.39376	0.113361	absent	Colorado
Canis latrans	lestes	NMNH	215111	160.936	59.024	19.645	*	0.36675	0.122067	absent	Colorado
Canis latrans	lestes	NMNH	215099	157.486	59.686	17.686	*	0.37899	0.112302	absent	Colorado
Canis latrans	lestes	NMNH	215098	147.309	60.033	16.34	*	0.40753	0.110923	absent	Colorado
Canis latrans	lestes	NMNH	216331	163.236	60.243	16.119	*	0.36905	0.098747	absent	Colorado
Canis latrans	lestes	NMNH	216332	143.614	48.325	15.335	*	0.33649	0.106779	absent	Colorado
Canis latrans	lestes	NMNH	216333	158.874	66.068	16.061	*	0.41585	0.101093	absent	Colorado
Canis latrans	lestes	NMNH	216334	169.745	64.392	21.118	*	0.37935	0.12441	absent	Colorado
Canis latrans	lestes	NMNH	216335	165.504	50.613	11.811	*	0.30581	0.071364	absent	Colorado
Canis latrans	lestes	NMNH	216342	161.958	54.412	14.666	*	0.33596	0.090554	absent	Colorado
Canis latrans	lestes	NMNH	216343	144.417	50.017	12.781	*	0.34634	0.088501	absent	Colorado
Canis latrans	lestes	NMNH	216344	140.522	47.437	14.545	*	0.33758	0.103507	absent	Colorado
Canis latrans	lestes	NMNH	223493	139.512	52.744	14.12	*	0.37806	0.10121	absent	Colorado
Canis latrans	lestes	NMNH	216361	173.886	72.537	19.074	*	0.41715	0.109693	absent	Colorado
Canis latrans	lestes	NMNH	216360	175.438	58.772	*	*	0.335	0	absent	Colorado
Canis latrans	lestes	NMNH	216346	169.964	59.369	15.123	*	0.3493	0.088978	absent	Colorado
Canis latrans	lestes	NMNH	216345	157.525	55.493	15.751	*	0.35228	0.09999	absent	Colorado
Canis latrans	lestes	NMNH	224849	153.818	57.382	17.012	*	0.37305	0.110598	absent	Colorado
Canis latrans	lestes	NMNH	224976	144.32	53.657	13.965	*	0.37179	0.096764	absent	Colorado
Canis latrans	lestes	NMNH	224977	127.777	46.329	11.617	*	0.36258	0.090916	absent	Colorado
Canis latrans	lestes	NMNH	224983	139.834	54.366	14.292	*	0.38879	0.102207	absent	Colorado
Canis latrans	lestes	NMNH	224986	167.922	63.135	*	*	0.37598	0	absent	Colorado
Canis latrans	lestes	NMNH	224987	131.407	53.023	16.37	*	0.4035	0.124575	absent	Colorado
Canis latrans	lestes	NMNH	224988	133.36	51.233	13.259	*	0.38417	0.099423	absent	Colorado
Canis latrans	lestes	NMNH	225019	133.198	35.057	12.147	*	0.26319	0.091195	absent	Colorado
Canis latrans	lestes	NMNH	225001	134.612	47.211	12.569	*	0.35072	0.093372	absent	Colorado
Canis latrans	lestes	NMNH	225000	131.661	49.427	14.022	*	0.37541	0.106501	absent	Colorado
Canis latrans	lestes	NMNH	224998	134.306	54.326	14.83	*	0.40449	0.110419	absent	Colorado
Canis latrans	lestes	NMNH	224996	137.951	50.254	13.909	*	0.36429	0.100826	absent	Colorado
Canis latrans	lestes	NMNH	225021	150.229	56.141	14.509	*	0.3737	0.096579	absent	Colorado
Canis latrans	lestes	NMNH	225022	142.93	53.321	13.112	*	0.37306	0.091737	absent	Colorado
Canis latrans	lestes	NMNH	225023	141.735	59.275	18.887	*	0.41821	0.133256	absent	Colorado
Canis latrans	lestes	NMNH	225024	154.099	57.747	15.893	*	0.37474	0.103135	absent	Colorado
Canis latrans	lestes	NMNH	225027	139.985	52.428	15.059	*	0.37453	0.107576	absent	Colorado
Canis latrans	lestes	NMNH	225029	134.516	55.942	19.446	*	0.41588	0.144563	absent	Colorado
Canis latrans	lestes	NMNH	225030	129.21	49.915	14.051	*	0.38631	0.108745	absent	Colorado
Canis latrans	lestes	NMNH	225053	143.71	56.911	19.225	*	0.39601	0.133776	absent	Colorado
Canis latrans	lestes	NMNH	225051	153.895	56.532	12.812	*	0.36734	0.083252	absent	Colorado
Canis latrans	lestes	NMNH	225050	159.748	54.014	17.536	*	0.33812	0.109773	absent	Colorado
Canis latrans	lestes	NMNH	225034	127.057	52.425	17.15	*	0.41261	0.134979	absent	Colorado
Canis latrans	lestes	NMNH	225033	133.816	51.775	16.651	*	0.38691	0.124432	absent	Colorado
Canis latrans	lestes	NMNH	225032	140.711	49.529	15.411	*	0.35199	0.109522	absent	Colorado
Canis latrans	lestes	NMNH	225031	164.961	51.766	15.636	*	0.31381	0.094786	absent	Colorado
Canis latrans	lestes	NMNH	225058	143.811	57.06	15.382	*	0.39677	0.10696	absent	Colorado
Canis latrans	lestes	NMNH	225060	151.01	50.26	16.515	*	0.33283	0.109364	absent	Colorado
Canis latrans	lestes	NMNH	225061	170.609	69.828	19.554	*	0.40929	0.114613	absent	Colorado
Canis latrans	lestes	NMNH	225062	156.68	58.661	17.773	*	0.3744	0.113435	absent	Colorado
Canis latrans	lestes	NMNH	225063	158.205	51.839	16.845	*	0.32767	0.106476	absent	Colorado
Canis latrans	lestes	NMNH	225073	133.915	48.184	15.182	*	0.35981	0.11337	absent	Colorado
Canis latrans	lestes	NMNH	225072	134.346	46.854	11.992	*	0.34876	0.089262	absent	Colorado
Canis latrans	lestes	NMNH	225071	142.298	54.049	14.043	*	0.37983	0.098687	absent	Colorado
Canis latrans	lestes	NMNH	225070	145.382	53.855	13.072	*	0.37044	0.089915	absent	Colorado
Canis latrans	lestes	NMNH	225067	145.746	51.665	12.272	*	0.35449	0.084201	absent	Colorado
Canis latrans	lestes	NMNH	225065	130.328	51.711	15.254	*	0.39678	0.117043	absent	Colorado
Canis latrans	lestes	NMNH	225324	154.131	53.181	13.37	*	0.34504	0.086744	absent	Colorado
Canis latrans	lestes	NMNH	270340	131.189	47.752	13.516	*	0.36399	0.103027	absent	Colorado
Canis latrans	lestes	NMNH	288208	126.342	47.416	12.855	*	0.3753	0.101748	absent	Colorado
Canis latrans	lestes	NMNH	533111	139.047	52.981	18.556	*	0.38103	0.133451	absent	Colorado
Canis latrans	lestes	NMNH	A31556	148.748	53.546	10.868	*	0.35998	0.073063	absent	Idaho
Canis latrans	lestes	NMNH	A31557	147.61	57.632	14.591	*	0.39043	0.098848	absent	Idaho
Canis latrans	lestes	NMNH	156762	131.133	52.332	11.058	*	0.39908	0.084327	absent	Idaho
Canis latrans	lestes	NMNH	156761	148.524	56.357	13.412	*	0.37945	0.090302	absent	Idaho
Canis latrans	lestes	NMNH	156760	145.488	47.468	13.921	*	0.32627	0.095685	absent	Idaho
Canis latrans	lestes	NMNH	156759	138.705	43.37	12.358	*	0.31268	0.089096	absent	Idaho
Canis latrans	lestes	NMNH	140624	136.205	49.428	14.676	*	0.36289	0.107749	absent	Idaho
Canis latrans	lestes	NMNH	139145	121.104	48.814	16.446	*	0.40308	0.135801	absent	Idaho
Canis latrans	lestes	NMNH	210720	164.068	55.287	16.187	*	0.33698	0.09866	absent	Idaho
Canis latrans	lestes	NMNH	210718	163.77	62.325	20.689	*	0.38056	0.12633	absent	Idaho
Canis latrans	lestes	NMNH	210714	140.843	54.658	17.73	*	0.38808	0.125885	absent	Idaho
Canis latrans	lestes	NMNH	210435	134.617	52.013	14.736	*	0.38638	0.109466	absent	Idaho
Canis latrans	lestes	NMNH	180047	136.226	51.24	11.981	*	0.37614	0.087949	absent	Idaho
Canis latrans	lestes	NMNH	160666	175.526	63.615	13.677	*	0.36242	0.07792	absent	Idaho
Canis latrans	lestes	NMNH	210721	125.234	52.036	14.124	*	0.41551	0.112781	absent	Idaho
Canis latrans	lestes	NMNH	210722	128.743	53.078	16.625	*	0.41228	0.129133	absent	Idaho
Canis latrans	lestes	NMNH	210723	141.28	54.04	16.016	*	0.3825	0.113364	absent	Idaho
Canis latrans	lestes	NMNH	210724	142.023	52.558	13.794	*	0.37007	0.097125	absent	Idaho
Canis latrans	lestes	NMNH	210725	134.022	51.611	13.665	*	0.38509	0.101961	absent	Idaho
Canis latrans	lestes	NMNH	210726	141.992	53.955	13.512	*	0.37999	0.09516	absent	Idaho
Canis latrans	lestes	NMNH	210727	142.742	56.422	12.59	*	0.39527	0.088201	absent	Idaho
Canis latrans	lestes	NMNH	210728	140.565	51.658	12.13	*	0.3675	0.086295	absent	Idaho
Canis latrans	lestes	NMNH	210774	127.68	48.524	12.783	*	0.38004	0.100117	absent	Idaho
Canis latrans	lestes	NMNH	211428	160.571	61.792	17.424	11.749	0.38483	0.108513	present	Idaho
Canis latrans	lestes	NMNH	216463	166.545	63.735	19.185	*	0.38269	0.115194	absent	Idaho
Canis latrans	lestes	NMNH	216459	150.361	52.16	14.005	*	0.3469	0.093143	absent	Idaho
Canis latrans	lestes	NMNH	216458	138.5	52.758	15.977	5.964	0.38092	0.115357	present	Idaho
Canis latrans	lestes	NMNH	216455	132.989	51.874	13.855	*	0.39006	0.104182	absent	Idaho
Canis latrans	lestes	NMNH	216454	167.704	63.435	17.283	*	0.37826	0.103057	absent	Idaho
Canis latrans	lestes	NMNH	216407	159.179	61.156	16.082	*	0.3842	0.101031	absent	Idaho
Canis latrans	lestes	NMNH	216406	149.284	50.414	9.623	*	0.33771	0.064461	absent	Idaho
Canis latrans	lestes	NMNH	211427	166.576	61.304	18.552	*	0.36802	0.111373	absent	Idaho
Canis latrans	lestes	NMNH	222035	137.526	59.294	15.227	*	0.43115	0.110721	absent	Idaho
Canis latrans	lestes	NMNH	222034	143.428	50.804	13.975	*	0.35421	0.097436	absent	Idaho
Canis latrans	lestes	NMNH	222033	163.2	56.089	14.319	*	0.34368	0.087739	absent	Idaho
Canis latrans	lestes	NMNH	222032	138.732	49.326	14.935	*	0.35555	0.107654	absent	Idaho
Canis latrans	lestes	NMNH	222031	142.479	48.552	14.666	*	0.34077	0.102934	absent	Idaho
Canis latrans	lestes	NMNH	222030	147.049	61.75	20.264	*	0.41993	0.137804	absent	Idaho
Canis latrans	lestes	NMNH	222029	152.351	51.652	14.263	*	0.33903	0.093619	absent	Idaho
Canis latrans	lestes	NMNH	222028	130.445	53.426	16.718	*	0.40957	0.128161	absent	Idaho
Canis latrans	lestes	NMNH	222027	143.608	54.072	15.349	*	0.37652	0.106881	absent	Idaho
Canis latrans	lestes	NMNH	222055	155.405	61.803	15.425	*	0.39769	0.099257	absent	Idaho
Canis latrans	lestes	NMNH	222054	157.852	59.322	21.467	*	0.37581	0.135994	absent	Idaho
Canis latrans	lestes	NMNH	222053	133.166	53.888	17.792	*	0.40467	0.133608	absent	Idaho
Canis latrans	lestes	NMNH	222052	150.675	59.693	14.522	*	0.39617	0.09638	absent	Idaho
Canis latrans	lestes	NMNH	222051	130.487	39.626	10.793	*	0.30368	0.082713	absent	Idaho
Canis latrans	lestes	NMNH	222050	150.391	47.46	13.522	*	0.31558	0.089912	absent	Idaho
Canis latrans	lestes	NMNH	222049	161.476	51.572	18.011	*	0.31938	0.11154	absent	Idaho
Canis latrans	lestes	NMNH	222036	163.659	64.05	18.346	*	0.39136	0.112099	absent	Idaho
Canis latrans	lestes	NMNH	224721	148.447	56.808	12.563	*	0.38268	0.08463	absent	Idaho
Canis latrans	lestes	NMNH	224723	161.83	60.603	13.37	*	0.37449	0.082618	absent	Idaho
Canis latrans	lestes	NMNH	224722	149.751	59.657	22.658	*	0.39837	0.151304	absent	Idaho
Canis latrans	lestes	NMNH	224718	157.265	54.619	15.308	*	0.34731	0.097339	absent	Idaho
Canis latrans	lestes	NMNH	224716	142.922	51.219	10.309	*	0.35837	0.07213	absent	Idaho
Canis latrans	lestes	NMNH	224715	158.523	53.303	12.134	*	0.33625	0.076544	absent	Idaho
Canis latrans	lestes	NMNH	224724	156.098	61.389	18.146	*	0.39327	0.116247	absent	Idaho
Canis latrans	lestes	NMNH	224725	147.014	56.974	17.343	*	0.38754	0.117968	absent	Idaho
Canis latrans	lestes	NMNH	224727	157.601	54.399	15.587	*	0.34517	0.098902	absent	Idaho
Canis latrans	lestes	NMNH	224754	148.244	52.186	16.12	*	0.35203	0.10874	absent	Idaho
Canis latrans	lestes	NMNH	224755	148.864	56.037	15.32	*	0.37643	0.102913	absent	Idaho
Canis latrans	lestes	NMNH	224756	147.831	59.193	13.662	*	0.40041	0.092416	absent	Idaho
Canis latrans	lestes	NMNH	224757	165.504	58.457	16.922	*	0.35321	0.102245	absent	Idaho
Canis latrans	lestes	NMNH	224758	157.275	51.914	16.263	*	0.33008	0.103405	absent	Idaho
Canis latrans	lestes	NMNH	214843	150.527	53.822	14.089	*	0.35756	0.093598	absent	Idaho
Canis latrans	lestes	NMNH	214842	162.462	63.381	15.511	*	0.39013	0.095475	absent	Idaho
Canis latrans	lestes	NMNH	214841	130.092	42.671	9.401	*	0.32801	0.072264	absent	Idaho
Canis latrans	lestes	NMNH	214840	159.079	55.402	13.207	*	0.34827	0.083022	absent	Idaho
Canis latrans	lestes	NMNH	214896	137.913	61.507	15.824	*	0.44598	0.114739	absent	Idaho
Canis latrans	lestes	NMNH	214897	129.824	56.688	17.594	*	0.43665	0.135522	absent	Idaho
Canis latrans	lestes	NMNH	214898	134.206	46.892	13.35	*	0.3494	0.099474	absent	Idaho
Canis latrans	lestes	NMNH	215119	157.1	57.559	16.654	*	0.36638	0.106009	absent	Idaho
Canis latrans	lestes	NMNH	215121	153.977	62.081	15.658	*	0.40318	0.101691	absent	Idaho
Canis latrans	lestes	NMNH	215122	153.389	49.648	9.512	*	0.32367	0.062012	absent	Idaho
Canis latrans	lestes	NMNH	212974	140.596	56.637	17.007	*	0.40284	0.120964	absent	Idaho
Canis latrans	lestes	NMNH	212975	115.934	43.596	13.098	*	0.37604	0.112978	absent	Idaho
Canis latrans	lestes	NMNH	212969	130.36	52.539	15.422	*	0.40303	0.118303	absent	Idaho
Canis latrans	lestes	NMNH	212968	152.233	58.142	17.209	*	0.38193	0.113044	absent	Idaho
Canis latrans	lestes	NMNH	212967	146.429	54.065	10.402	*	0.36922	0.071038	absent	Idaho
Canis latrans	lestes	NMNH	212946	131.719	44.058	8.871	*	0.33448	0.067348	absent	Idaho
Canis latrans	lestes	NMNH	24748	142.497	53.686	16.829	5.569	0.37675	0.118101	present	Nevada
Canis latrans	lestes	NMNH	212888	152.228	55.374	13.081	*	0.36376	0.08593	absent	Nevada
Canis latrans	lestes	NMNH	212886	139.075	49.898	15.699	*	0.35878	0.112882	absent	Nevada
Canis latrans	lestes	NMNH	212885	145.143	55.659	14.892	*	0.38348	0.102602	absent	Nevada
Canis latrans	lestes	NMNH	212884	136.484	52.587	14.886	*	0.3853	0.109068	absent	Nevada
Canis latrans	lestes	NMNH	212883	136.014	50.15	11.886	*	0.36871	0.087388	absent	Nevada
Canis latrans	lestes	NMNH	212882	143.904	51.839	17.064	*	0.36023	0.118579	absent	Nevada
Canis latrans	lestes	NMNH	212881	151.813	60.381	19.031	*	0.39773	0.125358	absent	Nevada
Canis latrans	lestes	NMNH	212890	132.904	56.917	19.933	*	0.42826	0.14998	absent	Nevada
Canis latrans	lestes	NMNH	212891	139.166	62.847	19.698	*	0.4516	0.141543	absent	Nevada
Canis latrans	lestes	NMNH	212892	131.486	53.031	18.207	*	0.40332	0.138471	absent	Nevada
Canis latrans	lestes	NMNH	212893	133.834	60.499	20.003	7.081	0.45205	0.149461	present	Nevada
Canis latrans	lestes	NMNH	212894	145.688	49.021	12.843	*	0.33648	0.088154	absent	Nevada
Canis latrans	lestes	NMNH	212895	164.093	58.583	16.717	*	0.35701	0.101875	absent	Nevada
Canis latrans	lestes	NMNH	212896	151.729	52.766	14.745	*	0.34776	0.09718	absent	Nevada
Canis latrans	lestes	NMNH	212897	132.583	46.148	11.124	*	0.34807	0.083902	absent	Nevada
Canis latrans	lestes	NMNH	212898	153.703	54.09	17.01	*	0.35191	0.110668	absent	Nevada
Canis latrans	lestes	NMNH	211694	156.291	67.985	14.927	*	0.43499	0.095508	absent	Nevada
Canis latrans	lestes	NMNH	211693	116.621	43.531	13.565	*	0.37327	0.116317	absent	Nevada
Canis latrans	lestes	NMNH	211689	138.768	49.934	15.584	*	0.35984	0.112303	absent	Nevada
Canis latrans	lestes	NMNH	211688	122.344	49.137	13.202	*	0.40163	0.107909	absent	Nevada
Canis latrans	lestes	NMNH	211687	137.087	49.946	14.538	*	0.36434	0.106049	absent	Nevada
Canis latrans	lestes	NMNH	211686	129.84	58.97	18.656	*	0.45417	0.143685	absent	Nevada
Canis latrans	lestes	NMNH	211695	136.392	49.52	12.081	*	0.36307	0.088576	absent	Nevada
Canis latrans	lestes	NMNH	211696	152.382	51.268	14.133	*	0.33644	0.092747	absent	Nevada
Canis latrans	lestes	NMNH	211697	153.329	54.637	11.364	*	0.35634	0.074115	absent	Nevada
Canis latrans	lestes	NMNH	211698	134.071	55.412	11.714	*	0.4133	0.087372	absent	Nevada
Canis latrans	lestes	NMNH	211699	137.701	52.107	15.965	*	0.37841	0.11594	absent	Nevada
Canis latrans	lestes	NMNH	211700	155.357	59.587	16.227	*	0.38355	0.10445	absent	Nevada
Canis latrans	lestes	NMNH	211702	172.091	61.388	16.546	*	0.35672	0.096147	absent	Nevada
Canis latrans	lestes	NMNH	211121	136.051	47.152	13.486	*	0.34658	0.099125	absent	Nevada
Canis latrans	lestes	NMNH	211115	122.285	42.09	14.379	*	0.3442	0.117586	absent	Nevada
Canis latrans	lestes	NMNH	211008	121.166	47.263	16.806	*	0.39007	0.138702	absent	Nevada
Canis latrans	lestes	NMNH	210934	134.26	48.109	12.928	*	0.35833	0.096291	absent	Nevada
Canis latrans	lestes	NMNH	223489	126.231	48.738	15.783	3.358	0.3861	0.125033	present	Oregon
Canis latrans	lestes	NMNH	223486	132.756	45.825	13.763	*	0.34518	0.103671	absent	Oregon
Canis latrans	lestes	NMNH	224830	118.063	50.041	15.429	*	0.42385	0.130684	absent	Oregon
Canis latrans	lestes	NMNH	224832	146.672	57.083	14.711	*	0.38919	0.100299	absent	Oregon
Canis latrans	lestes	NMNH	224833	132.487	42.946	10.997	*	0.32415	0.083004	absent	Oregon
Canis latrans	lestes	NMNH	224834	134.431	45.611	10.115	*	0.33929	0.075243	absent	Oregon
Canis latrans	lestes	NMNH	224835	138.57	48.291	14.448	*	0.3485	0.104265	absent	Oregon
Canis latrans	lestes	NMNH	224836	139.057	43.379	13.085	*	0.31195	0.094098	absent	Oregon
Canis latrans	lestes	NMNH	224825	129.481	47.472	11.707	*	0.36663	0.090415	absent	Oregon
Canis latrans	lestes	NMNH	211267	154.467	50.717	14.575	2.365	0.32834	0.094357	present	Utah
Canis latrans	lestes	NMNH	211268	151.381	58.532	18.069	*	0.38665	0.119361	absent	Utah
Canis latrans	lestes	NMNH	211269	139.663	47.401	13.276	*	0.3394	0.095057	absent	Utah
Canis latrans	lestes	NMNH	211270	129.133	50.684	13.232	*	0.39249	0.102468	absent	Utah
Canis latrans	lestes	NMNH	211271	158.992	55.869	17.042	*	0.3514	0.107188	absent	Utah
Canis latrans	lestes	NMNH	211272	146.123	48.045	14.703	*	0.3288	0.100621	absent	Utah
Canis latrans	lestes	NMNH	211274	161.736	59.611	16.423	*	0.36857	0.101542	absent	Utah
Canis latrans	lestes	NMNH	211275	150.654	52.438	13.438	*	0.34807	0.089198	absent	Utah
Canis latrans	lestes	NMNH	211265	132.514	50.026	14.799	*	0.37751	0.111679	absent	Utah
Canis latrans	lestes	NMNH	211264	155.933	51.757	14.7	*	0.33192	0.094271	absent	Utah
Canis latrans	lestes	NMNH	211263	164.3	67.179	19.709	*	0.40888	0.119957	absent	Utah
Canis latrans	lestes	NMNH	211262	175.767	58.611	17.157	*	0.33346	0.097612	absent	Utah
Canis latrans	lestes	NMNH	211259	145.835	57.65	15.728	*	0.39531	0.107848	absent	Utah
Canis latrans	lestes	NMNH	211258	133.345	51.706	16.168	*	0.38776	0.121249	absent	Utah
Canis latrans	lestes	NMNH	211257	129.301	47.079	18.75	*	0.3641	0.14501	absent	Utah
Canis latrans	lestes	NMNH	211256	149.424	44.842	15.275	*	0.3001	0.102226	absent	Utah
Canis latrans	lestes	NMNH	215341	118.658	51.21	14.461	6.061	0.43158	0.121871	present	Utah
Canis latrans	lestes	NMNH	211413	150.037	53.365	16.403	*	0.35568	0.109326	absent	Utah
Canis latrans	lestes	NMNH	211414	135.37	49.802	17.254	*	0.3679	0.127458	absent	Utah
Canis latrans	lestes	NMNH	211415	148.184	54.211	16.909	*	0.36584	0.114108	absent	Utah
Canis latrans	lestes	NMNH	211416	151.245	54.591	12.015	*	0.36094	0.079441	absent	Utah
Canis latrans	lestes	NMNH	211417	183.349	56.836	15.914	*	0.30999	0.086796	absent	Utah
Canis latrans	lestes	NMNH	211418	133.135	47.165	13.689	*	0.35426	0.10282	absent	Utah
Canis latrans	lestes	NMNH	211419	144.629	46.718	13.059	*	0.32302	0.090293	absent	Utah
Canis latrans	lestes	NMNH	211420	126.981	56.194	18.408	*	0.44254	0.144967	absent	Utah
Canis latrans	lestes	NMNH	211743	178.63	64.533	18.079	*	0.36127	0.101209	absent	Utah
Canis latrans	lestes	NMNH	213178	167.317	57.335	13.913	*	0.34267	0.083154	absent	Utah
Canis latrans	lestes	NMNH	213177	149.18	60.681	17.722	*	0.40676	0.118796	absent	Utah
Canis latrans	lestes	NMNH	213176	119.303	46.531	12.05	*	0.39002	0.101003	absent	Utah
Canis latrans	lestes	NMNH	213175	146.607	50.864	14.414	*	0.34694	0.098317	absent	Utah
Canis latrans	lestes	NMNH	213172	178.099	62.094	13.957	*	0.34865	0.078367	absent	Utah
Canis latrans	lestes	NMNH	213171	145.019	47.72	15.189	*	0.32906	0.104738	absent	Utah
Canis latrans	lestes	NMNH	213170	147.553	51.112	17.694	*	0.3464	0.119916	absent	Utah
Canis latrans	lestes	NMNH	213169	151.691	55.794	15.799	*	0.36781	0.104153	absent	Utah
Canis latrans	lestes	NMNH	213168	137.826	54.802	10.992	7.585	0.39762	0.079753	present	Utah
Canis latrans	lestes	NMNH	221985	136.281	49.734	14.29	*	0.36494	0.104857	absent	Utah
Canis latrans	lestes	NMNH	221986	129.674	47.439	20.093	7.813	0.36583	0.15495	present	Utah
Canis latrans	lestes	NMNH	221987	137.617	51.481	15.407	*	0.37409	0.111956	absent	Utah
Canis latrans	lestes	NMNH	221988	155.187	55.988	15.242	*	0.36078	0.098217	absent	Utah
Canis latrans	lestes	NMNH	221989	159.686	54.081	15.717	*	0.33867	0.098424	absent	Utah
Canis latrans	lestes	NMNH	221990	133.6	49.246	16.567	*	0.36861	0.124004	absent	Utah
Canis latrans	lestes	NMNH	221991	149.443	45.54	13.334	*	0.30473	0.089225	absent	Utah
Canis latrans	lestes	NMNH	221992	160.966	53.461	11.299	*	0.33213	0.070195	absent	Utah
Canis latrans	lestes	NMNH	222672	149.872	52.182	14.29	*	0.34818	0.095348	absent	Utah
Canis latrans	lestes	NMNH	221972	132.889	51.143	10.681	*	0.38486	0.080375	absent	Utah
Canis latrans	lestes	NMNH	221969	121.759	49.752	14.189	*	0.40861	0.116533	absent	Utah
Canis latrans	lestes	NMNH	221968	127.957	47.289	12.691	*	0.36957	0.099182	absent	Utah
Canis latrans	lestes	NMNH	221967	136.097	48.089	16.207	*	0.35334	0.119084	absent	Utah
Canis latrans	lestes	NMNH	221964	161.217	61.722	16.921	*	0.38285	0.104958	absent	Utah
Canis latrans	lestes	NMNH	221963	146.932	58.028	18.648	*	0.39493	0.126916	absent	Utah
Canis latrans	lestes	NMNH	221962	125.72	50.977	14.146	*	0.40548	0.11252	absent	Utah
Canis latrans	lestes	NMNH	221960	134.084	50.817	17.662	*	0.37899	0.131723	absent	Utah
Canis latrans	lestes	NMNH	221959	159.552	59.075	16.797	*	0.37026	0.105276	absent	Utah
Canis latrans	lestes	NMNH	224753	144.49	58.443	18.102	*	0.40448	0.125282	absent	Utah
Canis latrans	lestes	NMNH	224769	158.548	55.156	13.398	*	0.34788	0.084504	absent	Utah
Canis latrans	lestes	NMNH	224752	154.029	55.395	12.746	*	0.35964	0.082751	absent	Utah
Canis latrans	lestes	NMNH	224767	145.366	58.916	18.445	*	0.40529	0.126887	absent	Utah
Canis latrans	lestes	NMNH	224751	153.624	50.895	11.815	*	0.3313	0.076909	absent	Utah
Canis latrans	lestes	NMNH	224750	138.775	48.867	10.556	*	0.35213	0.076066	absent	Utah
Canis latrans	lestes	NMNH	224766	136.028	56.526	*	*	0.41555	0	absent	Utah
Canis latrans	lestes	NMNH	224765	152.593	46.053	13.137	*	0.3018	0.086092	absent	Utah
Canis latrans	lestes	NMNH	221949	155.221	56.673	9.927	*	0.36511	0.063954	absent	Utah
Canis latrans	lestes	NMNH	221855	149.387	63.859	17.451	*	0.42747	0.116817	absent	Utah
Canis latrans	lestes	NMNH	221854	166.768	49.564	12.987	*	0.2972	0.077875	absent	Utah
Canis latrans	lestes	NMNH	221853	163.977	65.72	16.259	*	0.40079	0.099154	absent	Utah
Canis latrans	lestes	NMNH	221837	139.384	50.03	16.182	*	0.35894	0.116097	absent	Utah
Canis latrans	lestes	NMNH	221833	145.526	59.46	16.008	*	0.40859	0.110001	absent	Utah
Canis latrans	lestes	NMNH	221832	141.461	51.163	15.929	*	0.36168	0.112603	absent	Utah
Canis latrans	lestes	NMNH	221831	167.399	63.61	19.586	*	0.37999	0.117002	absent	Utah
Canis latrans	lestes	NMNH	216244	151.473	51.828	13.912	*	0.34216	0.091845	absent	Utah
Canis latrans	lestes	NMNH	221958	161.933	50.131	14.906	*	0.30958	0.09205	absent	Utah
Canis latrans	lestes	NMNH	221957	158.071	64.615	18.159	*	0.40877	0.114879	absent	Utah
Canis latrans	lestes	NMNH	221956	147.595	53.866	14.892	*	0.36496	0.100898	absent	Utah
Canis latrans	lestes	NMNH	221955	146.119	53.138	15.288	*	0.36366	0.104627	absent	Utah
Canis latrans	lestes	NMNH	221954	139.952	51.912	14.619	*	0.37093	0.104457	absent	Utah
Canis latrans	lestes	NMNH	221953	124.509	47.112	11.976	*	0.37838	0.096186	absent	Utah
Canis latrans	lestes	NMNH	221952	179.993	61.641	17.542	*	0.34246	0.097459	absent	Utah
Canis latrans	lestes	NMNH	221951	133.571	48.274	15.331	*	0.36141	0.114778	absent	Utah
Canis latrans	lestes	NMNH	224736	139.882	50.595	18.64	*	0.3617	0.133255	absent	Utah
Canis latrans	lestes	NMNH	224734	153.357	63.324	27.716	*	0.41292	0.180729	absent	Utah
Canis latrans	lestes	NMNH	224729	182.987	68.099	16.945	*	0.37215	0.092602	absent	Utah
Canis latrans	lestes	NMNH	224728	169.052	56.791	16.533	*	0.33594	0.097798	absent	Utah
Canis latrans	lestes	NMNH	224712	131.505	50.589	13.022	*	0.38469	0.099023	absent	Utah
Canis latrans	lestes	NMNH	224745	152.063	56.701	13.291	*	0.37288	0.087405	absent	Utah
Canis latrans	lestes	NMNH	224779	157.153	56.952	12.978	*	0.3624	0.082582	absent	Utah
Canis latrans	lestes	NMNH	224778	135.281	52.532	18.241	*	0.38832	0.134838	absent	Utah
Canis latrans	lestes	NMNH	224775	139.815	51.648	11.915	*	0.3694	0.08522	absent	Utah
Canis latrans	lestes	NMNH	224774	161.233	53.15	17.638	*	0.32965	0.109394	absent	Utah
Canis latrans	lestes	NMNH	224773	153.403	48.99	13.022	*	0.31935	0.084888	absent	Utah
Canis latrans	lestes	NMNH	249413	120.699	50.553	13.16	*	0.41884	0.109032	absent	Utah
Canis latrans	lestes	NMNH	249410	150.309	52.284	17.856	*	0.34784	0.118795	absent	Utah
Canis latrans	lestes	NMNH	249409	140.22	53.897	16.015	*	0.38437	0.114213	absent	Utah
Canis latrans	lestes	NMNH	249408	138.42	57.086	13.106	*	0.41241	0.094683	absent	Utah
Canis latrans	lestes	NMNH	249407	127.982	53.991	18.499	*	0.42186	0.144544	absent	Utah
Canis latrans	lestes	NMNH	249406	146.348	44.383	14.759	*	0.30327	0.100849	absent	Utah
Canis latrans	lestes	NMNH	249405	169.794	57.434	17.609	*	0.33826	0.103708	absent	Utah
Canis latrans	lestes	NMNH	A04210	156.967	51.221	14.303	*	0.32632	0.091121	absent	California
Canis latrans	lestes	NMNH	52741	118.519	40.872	13.497	*	0.34486	0.11388	absent	California
Canis latrans	lestes	NMNH	51436	124.38	44.046	12.86	*	0.35412	0.103393	absent	California
Canis latrans	lestes	NMNH	A45304	151.593	56.689	14.837	*	0.37396	0.097874	absent	California
Canis latrans	lestes	NMNH	A45305	148.195	48.188	13.232	*	0.32517	0.089288	absent	California
Canis latrans	lestes	NMNH	A49328	129.932	56.303	13.154	*	0.43333	0.101238	absent	California
Canis latrans	lestes	NMNH	A44146	134.045	48.816	12.29	*	0.36418	0.091686	absent	California
Canis latrans	lestes	NMNH	A44466	142.338	53.643	17.832	*	0.37687	0.125279	absent	California
Canis latrans	lestes	NMNH	51318	130.436	45.578	14.014	*	0.34943	0.10744	absent	California
Canis latrans	lestes	NMNH	68088	148.1	51.318	16.79	*	0.34651	0.113369	absent	California
Canis latrans	lestes	NMNH	95503	136.795	43.698	10.581	*	0.31944	0.077349	absent	California
Canis latrans	lestes	NMNH	97936	143.845	50.424	15.321	*	0.35054	0.10651	absent	California
Canis latrans	lestes	NMNH	97937	125.848	44.039	11.483	*	0.34994	0.091245	absent	California
Canis latrans	lestes	NMNH	97938	127.042	51.229	13.64	*	0.40324	0.107366	absent	California
Canis latrans	lestes	NMNH	98335	144.352	57.551	19.051	*	0.39869	0.131976	absent	California
Canis latrans	lestes	NMNH	140069	133.535	48.946	17.735	*	0.36654	0.132812	absent	California
Canis latrans	lestes	NMNH	140630	148.81	56.191	18.348	*	0.3776	0.123298	absent	California
Canis latrans	lestes	NMNH	140632	146.876	54.282	10.976	*	0.36958	0.07473	absent	California
Canis latrans	lestes	NMNH	140633	115.3	43.335	14.982	*	0.37585	0.129939	absent	California
Canis latrans	lestes	NMNH	140634	129.216	51.13	13.27	*	0.39569	0.102696	absent	California
Canis latrans	lestes	NMNH	146748	143.42	54.688	15.742	*	0.38131	0.109762	absent	California
Canis latrans	lestes	NMNH	146747	157.762	56.965	12.674	*	0.36108	0.080336	absent	California
Canis latrans	lestes	NMNH	146749	133.317	46.38	15.266	*	0.34789	0.114509	absent	California
Canis latrans	lestes	NMNH	148810	128.01	45.346	10.415	*	0.35424	0.081361	absent	California
Canis latrans	lestes	NMNH	148918	124.629	44.557	15.707	*	0.35752	0.12603	absent	California
Canis latrans	lestes	NMNH	151424	135.16	50.149	16.415	*	0.37103	0.121449	absent	California
Canis latrans	lestes	NMNH	151425	148.09	51.593	16.24	*	0.34839	0.109663	absent	California
Canis latrans	lestes	NMNH	151439	119.113	43.461	12.905	*	0.36487	0.108342	absent	California
Canis latrans	lestes	NMNH	170995	110.039	39.627	10.358	*	0.36012	0.09413	absent	California
Canis latrans	lestes	NMNH	170996	125.721	47.838	14.353	*	0.38051	0.114165	absent	California
Nyctereutes procyonoides	viverrinus	KUPRI	245	41.371	16.62	4.366	*	0.40173	0.105533	absent	Gifu
Nyctereutes procyonoides	viverrinus	KUPRI	246	42.648	18.58	3.767	*	0.43566	0.088328	absent	Gifu
Nyctereutes procyonoides	viverrinus	KUPRI	247	43.266	22.734	5.134	*	0.52545	0.118661	absent	Gifu
Nyctereutes procyonoides	viverrinus	KUPRI	248	47.162	21.33	3.412	*	0.45227	0.072346	absent	Gifu
Nyctereutes procyonoides	viverrinus	KUPRI	250	40.136	20.236	5.133	*	0.50419	0.12789	absent	Gifu
Nyctereutes procyonoides	viverrinus	KUPRI	251	40.92	21.355	6.141	*	0.52187	0.150073	absent	Gifu
Nyctereutes procyonoides	viverrinus	KUPRI	252	50.752	22.876	5.498	*	0.45074	0.108331	absent	Gifu
Nyctereutes procyonoides	viverrinus	KUPRI	253	38.817	21.099	4.333	*	0.54355	0.111626	absent	Gifu
Nyctereutes procyonoides	viverrinus	KUPRI	254	45.008	21.648	7.988	*	0.48098	0.17748	absent	Gifu
Nyctereutes procyonoides	viverrinus	KUPRI	255	47.254	25.862	7.849	*	0.5473	0.166102	absent	Gifu
Nyctereutes procyonoides	viverrinus	KUPRI	256	43.438	22.349	5.678	*	0.5145	0.130715	absent	Gifu
Nyctereutes procyonoides	viverrinus	KUPRI	257	44.836	20.494	4.259	*	0.45709	0.094991	absent	Gifu
Nyctereutes procyonoides	viverrinus	KUPRI	258	44.089	19.058	4.483	*	0.43226	0.101681	absent	Gifu
Nyctereutes procyonoides	viverrinus	KUPRI	259	43.251	21.212	5.976	*	0.49044	0.13817	absent	Gifu
Nyctereutes procyonoides	viverrinus	KUPRI	260	40.004	24.117	7.386	*	0.60286	0.184632	absent	Gifu
Nyctereutes procyonoides	viverrinus	KUPRI	261	41.485	24.416	5.584	*	0.58855	0.134603	absent	Gifu
Nyctereutes procyonoides	viverrinus	KUPRI	262	37.981	20.699	5.273	*	0.54498	0.138833	absent	Gifu
Nyctereutes procyonoides	viverrinus	KUPRI	263	45.448	22.464	5.594	2.072	0.49428	0.123086	present	Gifu
Nyctereutes procyonoides	viverrinus	KUPRI	264	41.803	22.533	4.392	*	0.53903	0.105064	absent	Gifu
Nyctereutes procyonoides	viverrinus	KUPRI	265	47.974	24.077	5.234	*	0.50188	0.109101	absent	Gifu
Nyctereutes procyonoides	viverrinus	KUPRI	266	42.611	19.349	5.143	*	0.45408	0.120697	absent	Gifu
Nyctereutes procyonoides	viverrinus	KUPRI	267	43.201	20.252	2.464	*	0.46879	0.057036	absent	Gifu
Nyctereutes procyonoides	viverrinus	KUPRI	268	44.943	23.467	5.445	*	0.52215	0.121153	absent	Gifu
Nyctereutes procyonoides	viverrinus	KUPRI	270	46.851	26.44	7.329	*	0.56434	0.156432	absent	Gifu
Nyctereutes procyonoides	viverrinus	KUPRI	271	45.361	20.408	4.471	*	0.4499	0.098565	absent	Gifu
Nyctereutes procyonoides	viverrinus	KUPRI	272	42.456	22.426	7.159	*	0.52822	0.168622	absent	Gifu
Nyctereutes procyonoides	viverrinus	KUPRI	273	41.368	20.993	3.201	*	0.50747	0.077379	absent	Gifu
Nyctereutes procyonoides	viverrinus	KUPRI	274	40.812	21.401	6.64	*	0.52438	0.162697	absent	Gifu
Nyctereutes procyonoides	viverrinus	KUPRI	276	35.579	19.555	4.122	*	0.54962	0.115855	absent	Gifu
Nyctereutes procyonoides	viverrinus	KUPRI	278	43.447	22.652	4.615	*	0.52137	0.106221	absent	Gifu
Nyctereutes procyonoides	viverrinus	KUPRI	280	45.267	23.69	*	*	0.52334	0	absent	Gifu
Nyctereutes procyonoides	viverrinus	KUPRI	282	43.278	23.639	6.458	*	0.54621	0.149221	absent	Gifu
Nyctereutes procyonoides	viverrinus	KUPRI	283	46.456	21.11	5.531	*	0.45441	0.119059	absent	Gifu
Nyctereutes procyonoides	viverrinus	KUPRI	285	46.603	22.914	7.241	*	0.49169	0.155376	absent	Gifu
Nyctereutes procyonoides	viverrinus	KUPRI	286	42.234	22.344	6.18	*	0.52905	0.146328	absent	Gifu
Nyctereutes procyonoides	viverrinus	KUPRI	287	41.097	21.92	4.261	*	0.53337	0.103682	absent	Gifu
Nyctereutes procyonoides	viverrinus	KUPRI	288	37.609	20.825	5.64	*	0.55372	0.149964	absent	Gifu
Nyctereutes procyonoides	viverrinus	KUPRI	289	43.502	25.314	6.188	*	0.5819	0.142246	absent	Gifu
Nyctereutes procyonoides	viverrinus	KUPRI	290	44.58	20.633	4.562	*	0.46283	0.102333	absent	Gifu
Nyctereutes procyonoides	viverrinus	KUPRI	293	45.544	23.899	5.901	*	0.52475	0.129567	absent	Gifu
Nyctereutes procyonoides	viverrinus	KUPRI	294	43.328	20.248	5.256	*	0.46732	0.121307	absent	Gifu
Nyctereutes procyonoides	viverrinus	KUPRI	295	39.411	18.854	4.326	*	0.47839	0.109766	absent	Gifu
Nyctereutes procyonoides	viverrinus	KUPRI	291	45.033	23.198	5.011	*	0.51513	0.111274	absent	Gifu
Nyctereutes procyonoides	viverrinus	KUPRI	292	44.081	20.585	4.67	*	0.46698	0.105941	absent	Gifu
Nyctereutes procyonoides	viverrinus	KUPRI	296	45.295	21.114	3.517	*	0.46614	0.077647	absent	Gifu
Nyctereutes procyonoides	viverrinus	KUPRI	297	39.701	20	4.358	*	0.50377	0.109771	absent	Gifu
Nyctereutes procyonoides	viverrinus	KUPRI	299	46.245	24.523	3.313	*	0.53028	0.07164	absent	Gifu
Nyctereutes procyonoides	viverrinus	KUPRI	300	42.352	18.952	5.415	*	0.44749	0.127857	absent	Gifu
Nyctereutes procyonoides	viverrinus	KUPRI	301	45.565	22.33	6.177	*	0.49007	0.135565	absent	Gifu
Nyctereutes procyonoides	viverrinus	KUPRI	303	45.971	19.734	5.212	*	0.42927	0.113376	absent	Gifu
Nyctereutes procyonoides	viverrinus	KUPRI	304	44.201	17.602	5.108	*	0.39823	0.115563	absent	Gifu
Nyctereutes procyonoides	viverrinus	KUPRI	306	44.916	21.366	2.844	*	0.47569	0.063318	absent	Gifu
Nyctereutes procyonoides	viverrinus	KUPRI	307	52.854	24.664	4.088	*	0.46664	0.077345	absent	Gifu
Nyctereutes procyonoides	viverrinus	KUPRI	308	40.538	20.74	3.353	*	0.51162	0.082713	absent	Gifu
Nyctereutes procyonoides	viverrinus	KUPRI	309	47.729	22.57	3.924	*	0.47288	0.082214	absent	Gifu
Nyctereutes procyonoides	viverrinus	KUPRI	310	43.831	20.662	3.367	*	0.4714	0.076818	absent	Gifu
Nyctereutes procyonoides	viverrinus	KUPRI	311	39.239	18.242	3.402	*	0.46489	0.086699	absent	Gifu
Nyctereutes procyonoides	viverrinus	KUPRI	312	49.847	21.289	4.911	*	0.42709	0.098521	absent	Gifu
Nyctereutes procyonoides	viverrinus	KUPRI	313	43.819	22.164	5.722	*	0.50581	0.130583	absent	Gifu
Nyctereutes procyonoides	viverrinus	KUPRI	314	43.733	23.159	5.265	*	0.52955	0.12039	absent	Gifu
Nyctereutes procyonoides	viverrinus	KUPRI	315	49.276	23.713	7.791	*	0.48123	0.158109	absent	Gifu
Nyctereutes procyonoides	viverrinus	KUPRI	317	42.676	24.803	6.403	*	0.58119	0.150037	absent	Gifu
Nyctereutes procyonoides	viverrinus	KUPRI	318	38.956	19.79	5.526	*	0.50801	0.141852	absent	Gifu
Nyctereutes procyonoides	viverrinus	KUPRI	319	39.163	20.446	4.553	*	0.52207	0.116258	absent	Gifu
Nyctereutes procyonoides	viverrinus	KUPRI	320	39.717	21.239	5.807	*	0.53476	0.146209	absent	Gifu
Nyctereutes procyonoides	viverrinus	KUPRI	321	40.917	20.647	4.271	*	0.50461	0.104382	absent	Gifu
Nyctereutes procyonoides	viverrinus	KUPRI	322	42.138	19.632	4.582	*	0.4659	0.108738	absent	Gifu
Nyctereutes procyonoides	viverrinus	KUPRI	323	42.554	19.99	4.489	*	0.46976	0.105489	absent	Gifu
Nyctereutes procyonoides	viverrinus	KUPRI	324	42.165	20.602	4.322	*	0.4886	0.102502	absent	Gifu
Nyctereutes procyonoides	viverrinus	KUPRI	325	47.859	20.019	*	*	0.41829	0	absent	Gifu
Nyctereutes procyonoides	viverrinus	KUPRI	326	42.822	21.42	5.283	*	0.50021	0.123371	absent	Gifu
Nyctereutes procyonoides	viverrinus	KUPRI	327	43.935	18.914	5.122	*	0.4305	0.116581	absent	Gifu
Nyctereutes procyonoides	viverrinus	KUPRI	328	49.247	23.438	4.481	*	0.47593	0.09099	absent	Gifu
Nyctereutes procyonoides	viverrinus	KUPRI	329	46.65	25.05	4.705	*	0.53698	0.100857	absent	Gifu
Nyctereutes procyonoides	viverrinus	KUPRI	330	45.398	23.642	6.28	*	0.52077	0.138332	absent	Gifu
Nyctereutes procyonoides	viverrinus	KUPRI	331	45.263	22.403	4.864	*	0.49495	0.107461	absent	Gifu
Nyctereutes procyonoides	viverrinus	KUPRI	332	42.607	19.927	4.489	*	0.46769	0.105358	absent	Gifu
Nyctereutes procyonoides	viverrinus	KUPRI	333	41.342	22.403	5.427	*	0.54189	0.131271	absent	Gifu
Nyctereutes procyonoides	viverrinus	KUPRI	334	41.718	20.087	3.804	*	0.48149	0.091184	absent	Gifu
Nyctereutes procyonoides	viverrinus	KUPRI	335	40.944	17.191	3.745	*	0.41987	0.091466	absent	Gifu
Nyctereutes procyonoides	viverrinus	KUPRI	336	44.391	20.206	4.147	*	0.45518	0.09342	absent	Gifu
Nyctereutes procyonoides	viverrinus	KUPRI	337	39.838	19.78	5.846	*	0.49651	0.146744	absent	Gifu
Nyctereutes procyonoides	viverrinus	KUPRI	338	44.745	23.718	5.159	*	0.53007	0.115298	absent	Gifu
Nyctereutes procyonoides	viverrinus	KUPRI	339	35.741	18.839	3.971	*	0.5271	0.111105	absent	Gifu
Nyctereutes procyonoides	viverrinus	KUPRI	340	44.94	22.296	7.831	2.354	0.49613	0.174255	present	Gifu
Nyctereutes procyonoides	viverrinus	KUPRI	341	49.175	25.234	6.264	*	0.51315	0.127382	absent	Gifu
Nyctereutes procyonoides	viverrinus	KUPRI	342	46.234	23.963	4.373	*	0.5183	0.094584	absent	Gifu
Nyctereutes procyonoides	viverrinus	KUPRI	343	47.841	23.402	5.66	*	0.48916	0.118309	absent	Gifu
Nyctereutes procyonoides	viverrinus	KUPRI	344	43.907	18.999	3.953	*	0.43271	0.090031	absent	Gifu
Nyctereutes procyonoides	viverrinus	KUPRI	345	47.766	23.52	3.184	*	0.4924	0.066658	absent	Gifu
Nyctereutes procyonoides	viverrinus	KUPRI	346	44.709	21.326	4.505	*	0.477	0.100763	absent	Gifu
Nyctereutes procyonoides	viverrinus	KUPRI	348	44.44	22.977	5.332	*	0.51703	0.119982	absent	Gifu
Nyctereutes procyonoides	viverrinus	KUPRI	349	43.493	23.742	6.539	*	0.54588	0.150346	absent	Gifu
Nyctereutes procyonoides	viverrinus	KUPRI	350	42.348	19.992	6.119	*	0.47209	0.144493	absent	Gifu
Nyctereutes procyonoides	viverrinus	KUPRI	351	42.008	19.551	7.601	3.307	0.46541	0.180942	present	Gifu
Nyctereutes procyonoides	viverrinus	KUPRI	352	40.611	17.955	4.41	*	0.44212	0.108591	absent	Gifu
Nyctereutes procyonoides	viverrinus	KUPRI	353	41.885	19.856	3.548	*	0.47406	0.084708	absent	Gifu
Nyctereutes procyonoides	viverrinus	KUPRI	354	48.01	24.396	6.226	*	0.50814	0.129681	absent	Gifu
Nyctereutes procyonoides	viverrinus	KUPRI	356	43.813	24.239	4.742	*	0.55324	0.108233	absent	Gifu
Nyctereutes procyonoides	viverrinus	KUPRI	357	40.452	19.901	5.862	*	0.49197	0.144912	absent	Gifu
Nyctereutes procyonoides	viverrinus	KUPRI	358	39.507	19.54	5.025	*	0.4946	0.127193	absent	Gifu
Nyctereutes procyonoides	viverrinus	KUPRI	359	51.445	26.582	5.183	*	0.51671	0.100748	absent	Gifu
Nyctereutes procyonoides	viverrinus	KUPRI	360	51.169	23.885	5.835	*	0.46679	0.114034	absent	Gifu
Nyctereutes procyonoides	viverrinus	KUPRI	361	44.48	19.821	5.042	*	0.44562	0.113354	absent	Gifu
Nyctereutes procyonoides	viverrinus	KUPRI	362	47.659	22.432	5.236	*	0.47068	0.109864	absent	Gifu
Nyctereutes procyonoides	viverrinus	KUPRI	363	45.23	21.921	5.238	*	0.48466	0.115808	absent	Gifu
Nyctereutes procyonoides	viverrinus	KUPRI	364	46.394	20.772	*	*	0.44773	0	absent	Gifu
Nyctereutes procyonoides	viverrinus	KUPRI	365	39.148	19.233	4.651	*	0.49129	0.118806	absent	Gifu
Nyctereutes procyonoides	viverrinus	KUPRI	366	42.145	21.554	6.505	*	0.51142	0.154348	absent	Gifu
Nyctereutes procyonoides	viverrinus	KUPRI	367	43.993	23.266	6.287	*	0.52886	0.142909	absent	Gifu
Nyctereutes procyonoides	viverrinus	KUPRI	368	36.217	16.879	5.318	*	0.46605	0.146837	absent	Gifu
Nyctereutes procyonoides	viverrinus	KUPRI	369	45.493	25.675	6.073	*	0.56437	0.133493	absent	Gifu
Nyctereutes procyonoides	viverrinus	KUPRI	370	48.281	23.732	8.672	*	0.49154	0.179615	absent	Gifu
Nyctereutes procyonoides	viverrinus	KUPRI	371	44.38	20.447	5.255	*	0.46073	0.118409	absent	Gifu
Nyctereutes procyonoides	viverrinus	KUPRI	372	46.953	20.584	6.098	*	0.4384	0.129875	absent	Gifu
Nyctereutes procyonoides	viverrinus	KUPRI	373	40.877	22.977	8.084	*	0.5621	0.197764	absent	Gifu
Nyctereutes procyonoides	viverrinus	KUPRI	374	43.008	22.096	6.972	*	0.51376	0.162109	absent	Gifu
Nyctereutes procyonoides	viverrinus	KUPRI	375	41.578	20.829	5.577	*	0.50096	0.134133	absent	Gifu
Nyctereutes procyonoides	viverrinus	KUPRI	377	41.483	19.599	4.173	*	0.47246	0.100595	absent	Gifu
Nyctereutes procyonoides	viverrinus	KUPRI	378	48.6	25.334	4.75	*	0.52128	0.097737	absent	Gifu
Nyctereutes procyonoides	viverrinus	KUPRI	379	42.143	19.484	5.359	*	0.46233	0.127162	absent	Gifu
Nyctereutes procyonoides	viverrinus	KUPRI	380	47.761	22.386	5.902	*	0.46871	0.123574	absent	Gifu
Nyctereutes procyonoides	viverrinus	KUPRI	977	44.032	21.515	5.704	*	0.48862	0.129542	absent	Gifu
Nyctereutes procyonoides	viverrinus	KUPRI	978	48.121	19.379	5.09	*	0.40271	0.105775	absent	Gifu
Nyctereutes procyonoides	viverrinus	KUPRI	979	42.339	19.659	5.386	*	0.46432	0.127211	absent	Gifu
Nyctereutes procyonoides	viverrinus	KUPRI	980	41.986	21.675	5.059	*	0.51624	0.120493	absent	Gifu
Nyctereutes procyonoides	viverrinus	KUPRI	982	39.629	18.828	*	*	0.47511	0	absent	Gifu
Nyctereutes procyonoides	viverrinus	KUPRI	983	44.784	22.912	5.274	*	0.51161	0.117765	absent	Gifu
Nyctereutes procyonoides	viverrinus	KUPRI	989	46.252	24.653	4.787	*	0.53301	0.103498	absent	Gifu
Nyctereutes procyonoides	viverrinus	KUPRI	990	46.337	22.609	6.067	*	0.48793	0.130932	absent	Gifu
Nyctereutes procyonoides	viverrinus	KUPRI	1011	42.267	17.344	*	*	0.41034	0	absent	Gifu
Nyctereutes procyonoides	viverrinus	KUPRI	1012	48.202	21.496	5.345	*	0.44596	0.110888	absent	Gifu
Nyctereutes procyonoides	viverrinus	KUPRI	1013	45.715	22.277	4.903	*	0.4873	0.107251	absent	Gifu
Nyctereutes procyonoides	viverrinus	KUPRI	1014	44.032	22.141	4.551	*	0.50284	0.103357	absent	Gifu
Nyctereutes procyonoides	viverrinus	KUPRI	768	44.399	22.675	6.005	1.85	0.51071	0.135251	present	Gifu
Nyctereutes procyonoides	viverrinus	KUPRI	238	43.411	19.42	*	*	0.44735	0	absent	Gifu
Nyctereutes procyonoides	viverrinus	KUPRI	239	48.694	25.452	6.032	*	0.52269	0.123876	absent	Gifu
Nyctereutes procyonoides	viverrinus	KUPRI	240	44.607	17.552	*	*	0.39348	0	absent	Gifu
Nyctereutes procyonoides	viverrinus	KUPRI	228	40.822	23.277	4.591	*	0.57021	0.112464	absent	Gifu
Nyctereutes procyonoides	viverrinus	KUPRI	164	41.334	23.207	4.999	*	0.56145	0.120942	absent	Gifu
Nyctereutes procyonoides	viverrinus	KUPRI	165	43.522	20.883	*	*	0.47983	0	absent	Gifu
Nyctereutes procyonoides	viverrinus	KUPRI	131	43.937	21.609	5.393	*	0.49182	0.122744	absent	Gifu
Nyctereutes procyonoides	viverrinus	KUPRI	132	48.305	21.101	*	*	0.43683	0	absent	Gifu
Nyctereutes procyonoides	viverrinus	KUPRI	90	38.058	18.317	5.338	*	0.48129	0.14026	absent	Gifu
Nyctereutes procyonoides	viverrinus	KUPRI	82	47.485	22.104	*	*	0.46549	0	absent	Gifu
Nyctereutes procyonoides	viverrinus	KUPRI	84	51.178	23.395	5.382	*	0.45713	0.105162	absent	Gifu
Nyctereutes procyonoides	viverrinus	KUPRI	59	41.066	21.647	2.346	*	0.52713	0.057128	absent	Gifu
Nyctereutes procyonoides	viverrinus	KUPRI	74	48.28	21.836	4.634	*	0.45228	0.095982	absent	Gifu
Nyctereutes procyonoides	viverrinus	KUPRI	77	47.138	21.864	*	*	0.46383	0	absent	Gifu
Nyctereutes procyonoides	viverrinus	KUPRI	39	41.374	22.779	*	*	0.55056	0	absent	Gifu
Nyctereutes procyonoides	viverrinus	KUPRI	40	38.926	20.975	*	*	0.53884	0	absent	Gifu
Nyctereutes procyonoides	viverrinus	KUPRI	6	38.778	18.636	5.128	*	0.48058	0.13224	absent	Gifu
Otocyon megalotis		NMNH	Data from Asahara (2013)	19.965				0.95172	0.836113	present	Otocyon
Otocyon megalotis		NMNH	Data from Asahara (2014)	18.425				0.97183	0.83365	present	Otocyon
Otocyon megalotis		NMNH	Data from Asahara (2015)	17.399				0.91252	0.805621	present	Otocyon
Otocyon megalotis		NMNH	Data from Asahara (2016)	21.048				0.90883	0.729048	present	Otocyon
Otocyon megalotis		NMNH	Data from Asahara (2017)	19.658				1.03841	0.78126	present	Otocyon
Otocyon megalotis		NMNH	Data from Asahara (2018)	17.937				1.03657	0.926075	present	Otocyon
Otocyon megalotis		NMNH	Data from Asahara (2019)	17.239				1.03121	0.886942	present	Otocyon
Urocyon cinereoargenteus	scottii	NMNH	214347	39.883	25.059	7.199	2.432	0.62831	0.180503	present	Arizona
Urocyon cinereoargenteus	scottii	NMNH	14551	48.914	24.809	6.905	*	0.5072	0.141166	absent	Arizona
Urocyon cinereoargenteus	scottii	NMNH	19513	45.514	20.632	4.073	*	0.45331	0.089489	absent	Arizona
Urocyon cinereoargenteus	scottii	NMNH	19514	45.545	24.323	7.375	*	0.53404	0.161928	absent	Arizona
Urocyon cinereoargenteus	scottii	NMNH	24489	53.149	33.14	10.434	*	0.62353	0.196316	absent	Arizona
Urocyon cinereoargenteus	scottii	NMNH	32348	47.87	21.135	9.5	*	0.44151	0.198454	absent	Arizona
Urocyon cinereoargenteus	scottii	NMNH	58394	39.137	21.027	6.121	*	0.53727	0.156399	absent	Arizona
Urocyon cinereoargenteus	scottii	NMNH	59904	43.49	22.414	3.692	*	0.51538	0.084893	absent	Arizona
Urocyon cinereoargenteus	scottii	NMNH	2905	40.507	23.857	6.935	*	0.58896	0.171205	absent	Arizona
Urocyon cinereoargenteus	scottii	NMNH	156941	49.846	26.417	7.734	*	0.52997	0.155158	absent	Arizona
Urocyon cinereoargenteus	scottii	NMNH	156942	49.299	20.654	3.523	*	0.41895	0.071462	absent	Arizona
Urocyon cinereoargenteus	scottii	NMNH	156943	48.018	27.629	8.457	*	0.57539	0.176121	absent	Arizona
Urocyon cinereoargenteus	scottii	NMNH	159262	48.923	27.214	6.5	*	0.55626	0.132862	absent	Arizona
Urocyon cinereoargenteus	scottii	NMNH	180921	39.459	20.456	6.455	*	0.51841	0.163588	absent	Arizona
Urocyon cinereoargenteus	scottii	NMNH	202956	52.33	24.952	5.849	*	0.47682	0.111771	absent	Arizona
Urocyon cinereoargenteus	scottii	NMNH	188089	41.484	22.271	6.934	*	0.53686	0.167149	absent	Arizona
Urocyon cinereoargenteus	scottii	NMNH	202977	43.884	25.494	4.738	*	0.58094	0.107966	absent	Arizona
Urocyon cinereoargenteus	scottii	NMNH	202934	43.773	21.86	5.289	*	0.49939	0.120828	absent	Arizona
Urocyon cinereoargenteus	scottii	NMNH	205805	49.126	26.798	6.913	*	0.5455	0.14072	absent	Arizona
Urocyon cinereoargenteus	scottii	NMNH	212480	46.565	24.013	6.8	*	0.51569	0.146032	absent	Arizona
Urocyon cinereoargenteus	scottii	NMNH	214336	43.925	23.982	6.998	*	0.54598	0.159317	absent	Arizona
Urocyon cinereoargenteus	scottii	NMNH	214337	48.769	22.687	4.674	*	0.46519	0.09584	absent	Arizona
Urocyon cinereoargenteus	scottii	NMNH	214338	41.496	25.333	7.313	*	0.61049	0.176234	absent	Arizona
Urocyon cinereoargenteus	scottii	NMNH	244201	54.846	25.45	5.121	*	0.46403	0.093371	absent	Arizona
Urocyon cinereoargenteus	scottii	NMNH	257666	45.121	23.682	5.663	*	0.52486	0.125507	absent	Arizona
Urocyon cinereoargenteus	scottii	NMNH	257667	49.785	24.621	6.131	*	0.49455	0.12315	absent	Arizona
Urocyon cinereoargenteus	scottii	NMNH	257668	48.009	24.766	4.58	*	0.51586	0.095399	absent	Arizona
Urocyon cinereoargenteus	scottii	NMNH	274793	41.261	19.911	5.07	*	0.48256	0.122876	absent	Arizona
Urocyon cinereoargenteus	scottii	NMNH	289006	53.017	29.443	9.89	*	0.55535	0.186544	absent	Arizona
Urocyon cinereoargenteus	scottii	NMNH	119851	46.257	24.635	7.661	*	0.53257	0.165618	absent	NewMexico
Urocyon cinereoargenteus	scottii	NMNH	119852	45.024	24.555	7.348	*	0.54538	0.163202	absent	NewMexico
Urocyon cinereoargenteus	scottii	NMNH	159278	46.648	22.541	6.153	*	0.48321	0.131903	absent	NewMexico
Urocyon cinereoargenteus	scottii	NMNH	20359	51.964	23.03	7.493	*	0.44319	0.144196	absent	NewMexico
Urocyon cinereoargenteus	scottii	NMNH	69966	53.966	24.914	7.103	*	0.46166	0.13162	absent	NewMexico
Urocyon cinereoargenteus	scottii	NMNH	71037	42.419	20.997	5.538	*	0.49499	0.130555	absent	NewMexico
Urocyon cinereoargenteus	scottii	NMNH	119855	46.025	24.759	8.061	*	0.53795	0.175144	absent	NewMexico
Urocyon cinereoargenteus	scottii	NMNH	119856	43.545	22.861	5.83	*	0.525	0.133884	absent	NewMexico
Urocyon cinereoargenteus	scottii	NMNH	120439	47.625	27.985	8.016	*	0.58761	0.168315	absent	NewMexico
Urocyon cinereoargenteus	scottii	NMNH	125711	48.776	25.5	7.173	*	0.5228	0.14706	absent	NewMexico
Urocyon cinereoargenteus	scottii	NMNH	125712	53.175	30.603	6.857	*	0.57551	0.128952	absent	NewMexico
Urocyon cinereoargenteus	scottii	NMNH	119854	45.275	23.539	7.006	*	0.51991	0.154743	absent	NewMexico
Urocyon cinereoargenteus	scottii	NMNH	130673	47.663	27.686	10.607	4.001	0.58087	0.222542	present	NewMexico
Urocyon cinereoargenteus	scottii	NMNH	130664	47.41	23.433	7.006	*	0.49426	0.147775	absent	NewMexico
Urocyon cinereoargenteus	scottii	NMNH	147378	46.693	19.787	5.921	*	0.42377	0.126807	absent	NewMexico
Urocyon cinereoargenteus	scottii	NMNH	131577	51.198	18.61	7.545	*	0.36349	0.147369	absent	NewMexico
Urocyon cinereoargenteus	scottii	NMNH	131576	50.736	27.551	8.295	*	0.54303	0.163493	absent	NewMexico
Urocyon cinereoargenteus	scottii	NMNH	157334	47.27	22.812	7.279	*	0.48259	0.153988	absent	NewMexico
Urocyon cinereoargenteus	scottii	NMNH	157124	44.83	23.929	6.457	*	0.53377	0.144033	absent	NewMexico
Urocyon cinereoargenteus	scottii	NMNH	156847	41.952	20.796	6.354	*	0.49571	0.151459	absent	NewMexico
Urocyon cinereoargenteus	scottii	NMNH	151258	38.678	23.327	6.946	*	0.60311	0.179585	absent	NewMexico
Urocyon cinereoargenteus	scottii	NMNH	151256	47.916	24.727	7.638	*	0.51605	0.159404	absent	NewMexico
Urocyon cinereoargenteus	scottii	NMNH	151255	48.804	27.138	7.892	*	0.55606	0.161708	absent	NewMexico
Urocyon cinereoargenteus	scottii	NMNH	151254	45.823	20.347	6.548	*	0.44403	0.142898	absent	NewMexico
Urocyon cinereoargenteus	scottii	NMNH	151253	48.488	27.49	8.304	*	0.56694	0.171259	absent	NewMexico
Urocyon cinereoargenteus	scottii	NMNH	151252	46.649	22.729	6.75	*	0.48723	0.144698	absent	NewMexico
Urocyon cinereoargenteus	scottii	NMNH	151251	45.925	25.698	10.536	3.511	0.55956	0.229418	present	NewMexico
Urocyon cinereoargenteus	scottii	NMNH	151250	51.28	26.5	7.767	*	0.51677	0.151463	absent	NewMexico
Urocyon cinereoargenteus	scottii	NMNH	151249	47.114	25.927	7.283	*	0.5503	0.154583	absent	NewMexico
Urocyon cinereoargenteus	scottii	NMNH	151248	49.496	25.048	6.427	*	0.50606	0.129849	absent	NewMexico
Urocyon cinereoargenteus	scottii	NMNH	151246	42.527	20.546	5.213	*	0.48313	0.122581	absent	NewMexico
Urocyon cinereoargenteus	scottii	NMNH	151245	44.979	23.05	6.516	*	0.51246	0.144868	absent	NewMexico
Urocyon cinereoargenteus	scottii	NMNH	151244	41.56	21.304	7.312	*	0.51261	0.175938	absent	NewMexico
Urocyon cinereoargenteus	scottii	NMNH	151243	44.949	23.232	6.457	*	0.51685	0.143652	absent	NewMexico
Urocyon cinereoargenteus	scottii	NMNH	151235	47.493	23.056	6.649	*	0.48546	0.14	absent	NewMexico
Urocyon cinereoargenteus	scottii	NMNH	151233	47.517	25.006	6.319	*	0.52625	0.132984	absent	NewMexico
Urocyon cinereoargenteus	scottii	NMNH	151232	49.496	26.699	9.06	2.995	0.53942	0.183045	present	NewMexico
Urocyon cinereoargenteus	scottii	NMNH	151231	47.163	26.485	7.142	*	0.56156	0.151432	absent	NewMexico
Urocyon cinereoargenteus	scottii	NMNH	151230	50.001	21.885	5.121	*	0.43769	0.102418	absent	NewMexico
Urocyon cinereoargenteus	scottii	NMNH	151229	44.461	24.327	7.266	*	0.54715	0.163424	absent	NewMexico
Urocyon cinereoargenteus	scottii	NMNH	148962	49.089	25.674	5.866	*	0.52301	0.119497	absent	NewMexico
Urocyon cinereoargenteus	scottii	NMNH	148963	52.782	26.934	10.35	*	0.51029	0.19609	absent	NewMexico
Urocyon cinereoargenteus	scottii	NMNH	148964	45.143	23.027	6.471	*	0.51009	0.143344	absent	NewMexico
Urocyon cinereoargenteus	scottii	NMNH	148966	50.98	27.285	7.852	*	0.53521	0.154021	absent	NewMexico
Urocyon cinereoargenteus	scottii	NMNH	148967	45.063	26.541	6.828	*	0.58898	0.151521	absent	NewMexico
Urocyon cinereoargenteus	scottii	NMNH	151223	42.459	22.886	7.061	*	0.53901	0.166302	absent	NewMexico
Urocyon cinereoargenteus	scottii	NMNH	148875	45.603	22.503	5.836	*	0.49345	0.127974	absent	NewMexico
Urocyon cinereoargenteus	scottii	NMNH	148874	49.782	26.575	7.586	*	0.53383	0.152384	absent	NewMexico
Urocyon cinereoargenteus	scottii	NMNH	148521	47.148	26.359	9.276	*	0.55907	0.196742	absent	NewMexico
Urocyon cinereoargenteus	scottii	NMNH	147415	54.954	26.637	7.686	*	0.48471	0.139862	absent	NewMexico
Urocyon cinereoargenteus	scottii	NMNH	147380	54.113	24.134	6.533	*	0.44599	0.120729	absent	NewMexico
Urocyon cinereoargenteus	scottii	NMNH	147379	46.33	22.833	5.392	*	0.49283	0.116382	absent	NewMexico
Urocyon cinereoargenteus	scottii	NMNH	223519	42.38	21.529	5.952	*	0.508	0.140444	absent	NewMexico
Urocyon cinereoargenteus	scottii	NMNH	223520	47.335	22.2	7.49	*	0.469	0.158234	absent	NewMexico
Urocyon cinereoargenteus	scottii	NMNH	223525	48.59	24.643	5.629	*	0.50716	0.115847	absent	NewMexico
Urocyon cinereoargenteus	scottii	NMNH	216582	45.512	24.887	7.547	*	0.54682	0.165824	absent	NewMexico
Urocyon cinereoargenteus	scottii	NMNH	216581	49.555	24.882	6.42	*	0.50211	0.129553	absent	NewMexico
Urocyon cinereoargenteus	scottii	NMNH	214208	46.462	21.515	6.406	*	0.46307	0.137876	absent	NewMexico
Urocyon cinereoargenteus	scottii	NMNH	216585	48.183	23.21	7.406	*	0.48171	0.153706	absent	NewMexico
Urocyon cinereoargenteus	scottii	NMNH	214204	47.5	24.359	8.84	*	0.51282	0.186105	absent	NewMexico
Urocyon cinereoargenteus	scottii	NMNH	216584	48.49	25.128	5.394	*	0.51821	0.111239	absent	NewMexico
Urocyon cinereoargenteus	scottii	NMNH	214203	49.309	28.454	9.422	*	0.57705	0.191081	absent	NewMexico
Urocyon cinereoargenteus	scottii	NMNH	176646	44.595	25.038	8.377	*	0.56145	0.187846	absent	NewMexico
Urocyon cinereoargenteus	scottii	NMNH	176647	46.039	24.446	6.882	*	0.53098	0.149482	absent	NewMexico
Urocyon cinereoargenteus	scottii	NMNH	176649	43.653	21.43	7.912	*	0.49092	0.181248	absent	NewMexico
Urocyon cinereoargenteus	scottii	NMNH	213105	45.726	23.9	7.094	*	0.52268	0.155141	absent	NewMexico
Urocyon cinereoargenteus	scottii	NMNH	214201	55.903	33.002	10.361	*	0.59034	0.185339	absent	NewMexico
Urocyon cinereoargenteus	scottii	NMNH	214202	45.388	28.995	8.306	*	0.63883	0.183	absent	NewMexico
Urocyon cinereoargenteus	scottii	NMNH	176643	42.01	20.934	6.497	*	0.49831	0.154654	absent	NewMexico
Urocyon cinereoargenteus	scottii	NMNH	176642	45.938	28.089	7.157	*	0.61145	0.155797	absent	NewMexico
Urocyon cinereoargenteus	scottii	NMNH	170881	50.328	22.804	7.128	*	0.45311	0.141631	absent	NewMexico
Urocyon cinereoargenteus	scottii	NMNH	170880	48.211	25.629	6.643	*	0.5316	0.13779	absent	NewMexico
Urocyon cinereoargenteus	scottii	NMNH	168189	50.142	25.103	6.681	*	0.50064	0.133242	absent	NewMexico
Urocyon cinereoargenteus	scottii	NMNH	159298	44.136	22.216	6.06	*	0.50335	0.137303	absent	NewMexico
Urocyon cinereoargenteus	scottii	NMNH	159299	51.658	24.872	7.493	*	0.48147	0.14505	absent	NewMexico
Urocyon cinereoargenteus	scottii	NMNH	159300	44.332	23.772	8.004	*	0.53623	0.180547	absent	NewMexico
Urocyon cinereoargenteus	scottii	NMNH	159301	49.642	30.75	8.711	*	0.61944	0.175476	absent	NewMexico
Urocyon cinereoargenteus	scottii	NMNH	159302	44.608	22.651	7.509	*	0.50778	0.168333	absent	NewMexico
Urocyon cinereoargenteus	scottii	NMNH	160636	54.77	31.143	10.908	*	0.56861	0.19916	absent	NewMexico
Urocyon cinereoargenteus	scottii	NMNH	167383	46.608	22.458	6.569	*	0.48185	0.140941	absent	NewMexico
Urocyon cinereoargenteus	scottii	NMNH	167990	54.51	28.875	6.157	*	0.52972	0.112952	absent	NewMexico
Urocyon cinereoargenteus	scottii	NMNH	159296	47.665	27.843	8.773	*	0.58414	0.184055	absent	NewMexico
Urocyon cinereoargenteus	scottii	NMNH	159295	46.471	23.654	7.446	*	0.50901	0.160229	absent	NewMexico
Urocyon cinereoargenteus	scottii	NMNH	159294	52.007	25.126	7.111	*	0.48313	0.136732	absent	NewMexico
Urocyon cinereoargenteus	scottii	NMNH	159293	45.62	27.931	7.422	*	0.61225	0.162692	absent	NewMexico
Urocyon cinereoargenteus	scottii	NMNH	259292	46.816	24.778	8.582	2.686	0.52926	0.183313	present	NewMexico
Urocyon cinereoargenteus	scottii	NMNH	159291	48.014	25.654	6.089	*	0.5343	0.126817	absent	NewMexico
Urocyon cinereoargenteus	scottii	NMNH	159287	45.67	22.376	6.864	*	0.48995	0.150296	absent	NewMexico
Urocyon cinereoargenteus	scottii	NMNH	259286	39.908	21.317	5.085	*	0.53415	0.127418	absent	NewMexico
Urocyon cinereoargenteus	scottii	NMNH	159285	43.691	24.474	6.113	*	0.56016	0.139914	absent	NewMexico
Urocyon cinereoargenteus	scottii	NMNH	159283	40.657	20.331	7.215	*	0.50006	0.17746	absent	NewMexico
Urocyon cinereoargenteus	scottii	NMNH	159279	48.157	25.543	7.344	*	0.53041	0.152501	absent	NewMexico
Urocyon cinereoargenteus	scottii	NMNH	159277	42.877	21.905	6.827	*	0.51088	0.159223	absent	NewMexico
Urocyon cinereoargenteus	scottii	NMNH	159280	48.201	25.57	6.047	*	0.53049	0.125454	absent	NewMexico
Urocyon cinereoargenteus	scottii	NMNH	159275	47.785	26.183	8.436	*	0.54793	0.176541	absent	NewMexico
Urocyon cinereoargenteus	scottii	NMNH	159274	45.757	21.795	7.015	*	0.47632	0.15331	absent	NewMexico
Urocyon cinereoargenteus	scottii	NMNH	159272	46.65	23.17	6.914	*	0.49668	0.14821	absent	NewMexico
Urocyon cinereoargenteus	scottii	NMNH	159263	47.264	26.163	7.404	*	0.55355	0.156652	absent	NewMexico
Urocyon cinereoargenteus	scottii	NMNH	159264	48.45	28.249	8.475	*	0.58305	0.174923	absent	NewMexico
Urocyon cinereoargenteus	scottii	NMNH	159265	53.441	27.922	9.27	*	0.52248	0.173462	absent	NewMexico
Urocyon cinereoargenteus	scottii	NMNH	159267	47.114	21.216	7.07	*	0.45031	0.150062	absent	NewMexico
Urocyon cinereoargenteus	scottii	NMNH	159268	41.17	18.411	4.629	*	0.44719	0.112436	absent	NewMexico
Urocyon cinereoargenteus	scottii	NMNH	259269	39.706	23.524	8.652	*	0.59245	0.217902	absent	NewMexico
Urocyon cinereoargenteus	scottii	NMNH	159271	42.463	21.297	6.902	*	0.50154	0.162542	absent	NewMexico
Urocyon cinereoargenteus	scottii	NMNH	158971	45.891	19.163	5.856	*	0.41758	0.127607	absent	NewMexico
Urocyon cinereoargenteus	scottii	NMNH	158970	46.039	23.476	7.533	*	0.50992	0.163622	absent	NewMexico
Urocyon cinereoargenteus	scottii	NMNH	158942	45.273	23.041	4.723	*	0.50893	0.104323	absent	NewMexico
		*NMNH: United States National Museum of Natural History
		*KUPRI: Kyoto University Primate Research Institute
